# Supplementary material for: Construction of a traditional Chinese medicine syndrome-specific outcome measure: the Kidney Deficiency Syndrome questionnaire (KDSQ)
Source: PubMed Central journal article supplement (PMC3479037; doi:10.1186/1472-6882-12-73), 2012-06-06
Supplement: 1472-6882-12-73-S1.pdf [file 1472-6882-12-73-S1.pdf]

## The Kidney Deficiency Syndromes Questionnaire (KDSQ)

( Please ✓ the ONE that suits you the most )

| Part I  | Questions                                                  | ✓  | About your urine in the past four weeks                                         |  |
|---------|------------------------------------------------------------|----|---------------------------------------------------------------------------------|--|
| 1.1     | How many times do you wake up to urinate during the night? | 0  | 0~1 time                                                                        |  |
|         |                                                            | 1  | 2~3 times                                                                       |  |
|         |                                                            | 2  | 4~5 times                                                                       |  |
|         |                                                            | 3  | 6 times or above                                                                |  |
| 1.2     | How frequent do you urinate during the day?                | 0  | Once every 2 hours or longer intervals                                          |  |
|         |                                                            | 1  | Once every 1-2 hour intervals                                                   |  |
|         |                                                            | 2  | Once every 30 minute to 1 hour intervals                                        |  |
|         |                                                            | 3  | Once in less than 30 minute intervals.                                          |  |
| 1.3     | Is there any dripping after urination?                     | 0  | No, urine is clear with no dripping.                                            |  |
|         |                                                            | 1  | Yes, there are a few urine drips before clearing.                               |  |
|         |                                                            | 2  | Yes, urine drips for a while before clearing.                                   |  |
|         |                                                            | 3  | Yes, urine drips and hardly clear.                                              |  |
| 1.4     | Do you experience urine incontinence during the day?       | 0  | No, not at all.                                                                 |  |
|         |                                                            | 1  | Sometimes, when I am tired.                                                     |  |
|         |                                                            | 2  | Yes, when I have the urge to urinate.                                           |  |
|         |                                                            | 3  | Yes, anytime. It seems that I do not have any control.                          |  |
| 1.5     | What do you think of your urine volume?                    | 0  | It is as usual.                                                                 |  |
|         |                                                            | 1  | It is slightly more than usual.                                                 |  |
|         |                                                            | 2  | It is moderately more than usual.                                               |  |
|         |                                                            | 3  | It is a lot more than usual.                                                    |  |
| Part II | Questions                                                  | ✓  | About your sexual activity in the past four weeks                               |  |
| 2.1     | Do you experience reduced libido?                          | 0  | No, I do not experience any change in libido.                                   |  |
|         |                                                            | 1  | Yes, I have desire for sex but sometimes difficult to become aroused and enjoy. |  |
|         |                                                            | 2  | Yes, I have little desire and enjoyment from sex.                               |  |
|         |                                                            | 3  | Yes, I have no desire for sex and I do not enjoy having sex.                    |  |
|         |                                                            | NA | I do not know. I don't have a sex partner in the past four weeks.               |  |
| 2.2     | Do you experience vaginal dryness?                         | 0  | No, it feels about the same as it does usually.                                 |  |
|         |                                                            | 1  | Yes, it feels a little more dry than usual.                                     |  |
|         |                                                            | 2  | Yes, it feels quite dry sometimes.                                              |  |

|          |                                                                          |   |                                                                                                      |  |
|----------|--------------------------------------------------------------------------|---|------------------------------------------------------------------------------------------------------|--|
|          |                                                                          | 3 | Yes, it feels very dry.                                                                              |  |
| Part III | <b>Questions</b>                                                         |   | <b>About your general health in the past four weeks</b>                                              |  |
| 3.1      | Do you feel energetic?                                                   | 0 | Yes, I feel energetic.                                                                               |  |
|          |                                                                          | 1 | No, I feel tired after work, but I recover soon after resting.                                       |  |
|          |                                                                          | 2 | No, I often feel tired, and need a long rest to recover.                                             |  |
|          |                                                                          | 3 | No, I feel very tired and can not recover after resting.                                             |  |
| 3.2      | Do you feel swelling in the face, hands and feet?                        | 0 | No, not at all.                                                                                      |  |
|          |                                                                          | 1 | Yes, sometimes I feel swelling in the face, hands or feet.                                           |  |
|          |                                                                          | 2 | Yes, I often feel swelling in the face, hands or feet.                                               |  |
|          |                                                                          | 3 | Yes, I feel swelling and distending in the face, hands or feet.                                      |  |
| 3.3      | Are you averse to wind and cold?                                         | 0 | No, not at all.                                                                                      |  |
|          |                                                                          | 1 | Yes, but I do not need to wear more clothing.                                                        |  |
|          |                                                                          | 2 | Yes, but I am fine after wearing more clothing.                                                      |  |
|          |                                                                          | 3 | Yes, I wear more clothing but still feel averse to cold.                                             |  |
| 3.4      | Do you feel cold or chills in the back?                                  | 0 | No, not at all.                                                                                      |  |
|          |                                                                          | 1 | Yes, sometimes but I do not need to wear more clothing.                                              |  |
|          |                                                                          | 2 | Yes, but I feel fine after wearing more clothing.                                                    |  |
|          |                                                                          | 3 | Yes, I feel cold in the back after wearing more clothing.                                            |  |
| 3.5      | Do you experience hot flushes in the cheeks?                             | 0 | No, not at all.                                                                                      |  |
|          |                                                                          | 1 | Yes, I experience occasional mild flushes in a week.                                                 |  |
|          |                                                                          | 2 | Yes, I have several moderate hot flushes in a week.                                                  |  |
|          |                                                                          | 3 | Yes, I have frequent severe hot flushes in a week.                                                   |  |
| 3.6      | Do you experience dizzy spells?                                          | 0 | No, not at all.                                                                                      |  |
|          |                                                                          | 1 | Yes, occasionally for a short period of time.                                                        |  |
|          |                                                                          | 2 | Yes, often with fluctuating severity, and I feel better with my eyes shut.                           |  |
|          |                                                                          | 3 | Yes, often severe as if in a boat the sky is moving, and I do not feel any better with my eyes shut. |  |
| 3.7      | Do you experience feverish feeling that comes and goes like tidal waves? | 0 | No, not at all.                                                                                      |  |
|          |                                                                          | 1 | Yes, sometimes and mild, comes and lasts for a short time.                                           |  |
|          |                                                                          | 2 | Yes, frequent and moderate, lasting for 30 minutes to an hour.                                       |  |
|          |                                                                          | 3 | Yes, every day and severe, lasting for an hour or longer.                                            |  |

|      |                                                                            |   |                                                                                                                      |  |
|------|----------------------------------------------------------------------------|---|----------------------------------------------------------------------------------------------------------------------|--|
| 3.8  | Do you have hot sensations in the chest, palms and the soles of your feet? | 0 | No, not at all.                                                                                                      |  |
|      |                                                                            | 1 | Yes, occasionally and mild.                                                                                          |  |
|      |                                                                            | 2 | Yes, often with fluctuating severity, or occurs intermittently.                                                      |  |
|      |                                                                            | 3 | Yes, often severe and I feel more comfortable in the cold.                                                           |  |
| 3.9  | Do you sweat during sleep?                                                 | 0 | No, not at all.                                                                                                      |  |
|      |                                                                            | 1 | Yes, sometimes, very little and my clothing is not wet.                                                              |  |
|      |                                                                            | 2 | Yes, there are wet patches in my clothing when I wake up.                                                            |  |
|      |                                                                            | 3 | Yes, my clothing is wet all over when I wake up.                                                                     |  |
| 3.10 | Is the sleep quality and quantity good?                                    | 0 | Yes, I sleep well.                                                                                                   |  |
|      |                                                                            | 1 | No, I sleep 5-6 hours and sometimes difficult to fall asleep.                                                        |  |
|      |                                                                            | 2 | No, I may sleep 3-4 hours and often difficult to fall asleep.                                                        |  |
|      |                                                                            | 3 | No, I may sleep 3 hours or less and difficult to fall asleep.                                                        |  |
| 3.11 | Do you tend to forget things that happened recently?                       | 0 | No, not at all.                                                                                                      |  |
|      |                                                                            | 1 | Yes, I am not remembering things as well as used to be.                                                              |  |
|      |                                                                            | 2 | Yes, I tend to forget things happened recently.                                                                      |  |
|      |                                                                            | 3 | Yes, I forget things happened recently and in the past.                                                              |  |
| 3.12 | Do you experience high pitch ringing in the ears?                          | 0 | No, not at all.                                                                                                      |  |
|      |                                                                            | 1 | Yes, relatively mild and some days I don't hear it.                                                                  |  |
|      |                                                                            | 2 | Yes, some days severe and some days mild.                                                                            |  |
|      |                                                                            | 3 | Yes, I constantly hear the sound.                                                                                    |  |
| 3.13 | Do you experience weakness in the back and knees?                          | 0 | No, not at all.                                                                                                      |  |
|      |                                                                            | 1 | Yes, I feel the weakness when I am standing up from the squatting position or tired, but I feel better after a rest. |  |
|      |                                                                            | 2 | Yes, I am difficult to stand up from the squatting position or walking the stairs.                                   |  |
|      |                                                                            | 3 | Yes, I am difficult to stand up from the squatting position, sitting, standing, or walking.                          |  |
| 3.14 | Do you experience pain in the joints other than the back and knees?        | 0 | No, not at all.                                                                                                      |  |
|      |                                                                            | 1 | Yes, mild.                                                                                                           |  |
|      |                                                                            | 2 | Yes, moderate.                                                                                                       |  |
|      |                                                                            | 3 | Yes, severe.                                                                                                         |  |
| 3.15 | Do you experience pain in the back and knees?                              | 0 | No, not at all.                                                                                                      |  |
|      |                                                                            | 1 | Yes, mild and I may not feel the pain sometimes.                                                                     |  |
|      |                                                                            | 2 | Yes, moderate and when I am tired, or recover after a rest.                                                          |  |

|      |                                                              |   |                                                               |  |
|------|--------------------------------------------------------------|---|---------------------------------------------------------------|--|
|      |                                                              | 3 | Yes, frequent and severe, and restrict the joint movement.    |  |
| 3.16 | Do you feel thirsty when wake up at night or in the morning? | 0 | No, not at all.                                               |  |
|      |                                                              | 1 | Yes, mild and I don't need to drink water.                    |  |
|      |                                                              | 2 | Yes, moderate and thirsty reduces with drinking water.        |  |
|      |                                                              | 3 | Yes, severe and thirsty does not reduce with drinking water.  |  |
| 3.17 | Do you dream at night sleep?                                 | 0 | No, not at all.                                               |  |
|      |                                                              | 1 | Yes, occasional dreaming but doesn't affect my sleep quality. |  |
|      |                                                              | 2 | Yes, almost every night but doesn't affect my sleep quality.  |  |
|      |                                                              | 3 | Yes, every night and affects my sleep quality.                |  |

(The questions correspondingly ask for the symptoms in Figures 1 & 2:

1.1, Frequent nocturnal urination; 1.2, Frequent daytime urination; 1.3, Urine dripping; 1.4, Urine incontinence; 1.5, Increased urine volume; 2.1, Low libido; 2.2, Vaginal dryness; 3.1, Lethargy; 3.2, Edema; 3.3, Aversion to cold; 3.4, Feeling cold in back; 3.5, Hot flushes; 3.6, Dizzy spells; 3.7, Tidal fever; 3.8, Feeling hot in palms and soles; 3.9, Night sweating; 3.10, Insomnia; 3.11, Forgetfulness; 3.12, Tinnitus; 3.13, Weakness in back & knees; 3.14, Pain in joints; 3.15, Pain in back & knees; 3.16, Thirsty at night; 3.17, Increased dreaming. )
